# Supplementary material for: Performance in Omics Analyses of Blood Samples in Long-Term Storage: Opportunities for the Exploitation of Existing Biobanks in Environmental Health Research
Source: PubMed Central journal article supplement (PMC3620742; doi:10.1289/ehp.1205657), 2013-02-05
Supplement: ehp.1205657.s001.pdf [file ehp.1205657.s001.pdf]

## Supplemental Material

# Performance in Omics Analyses of Blood Samples in Long-Term Storage: Opportunities for the Exploitation of Existing Biobanks in Environmental Health Research

Dennie G.A.J. Hebels, Panagiotis Georgiadis, Hector C. Keun, Toby J. Athersuch, Paolo Vineis, Roel Vermeulen, Lutzen Portengen, Ingvar A. Bergdahl, Göran Hallmans, Domenico Palli, Benedetta Bendinelli, Vittorio Krogh, Rosario Tumino, Carlotta Sacerdote, Salvatore Panico, Jos C.S. Kleinjans, Theo M.C.M. de Kok, Martyn T. Smith and Soterios A. Kyrtopoulos, on behalf of the EnviroGenomarkers project consortium

### **Contents:**

|                                                                                                                  |    |
|------------------------------------------------------------------------------------------------------------------|----|
| Table S1. Genes with significant differences in expression between at least two bench times based on ANOVA ..... | 2  |
| Table S2. Expression of blood reference and immunomodulatory marker genes .....                                  | 4  |
| Figure S1. Transcriptomics Phase 1.....                                                                          | 5  |
| Video.....                                                                                                       | 6  |
| Methods.....                                                                                                     | 6  |
| <i>Design of Phase I experiments</i> .....                                                                       | 6  |
| <i>Transcriptomics</i> .....                                                                                     | 7  |
| <i>Epigenomics</i> .....                                                                                         | 8  |
| <i>Metabolomics</i> .....                                                                                        | 9  |
| <i>Wide-target plasma proteomics</i> .....                                                                       | 10 |
| Table S3. Metabolomics - Solvent Gradient Conditions. ....                                                       | 11 |
| Table S4. Metabolomics - Standard Mass Spectrometry Instrument Conditions.....                                   | 11 |
| References.....                                                                                                  | 12 |

**Table S1. Genes with significant differences in expression between at least two bench times based on ANOVA**

| Gene         | log2 ratio 2h/0h | log2 ratio 4h/0h | log2 ratio 8h/0h | log2 ratio 2h/4h | log2 ratio 2h/8h | log2 ratio 4h/8h |
|--------------|------------------|------------------|------------------|------------------|------------------|------------------|
| ABCD3        | 1.01173          | 1.225805         | 1.4507075        | 0.214075         | 0.4389775        | 0.2249025        |
| ABL1         | 1.0386975        | 1.3287275        | 2.062365         | 0.29003          | 1.0236675        | 0.7336375        |
| ARMC8        | 0.662535         | 0.8666425        | 1.5257025        | 0.2041075        | 0.8631675        | 0.65906          |
| ASF1A        | -0.30725         | -0.84992         | -1.333305        | -0.54267         | -1.026055        | -0.483385        |
| ATP6V1C1     | -0.227875        | -0.5136675       | -0.79987         | -0.2857925       | -0.571995        | -0.2862025       |
| BCDIN3D      | -0.989055        | -1.94015         | -1.9625325       | -0.951095        | -0.9734775       | -0.0223825       |
| BTN2A2       | -0.3377025       | -0.700215        | -0.78728         | -0.3625125       | -0.4495775       | -0.087065        |
| C12orf65     | -0.53347         | -1.068165        | -1.387575        | -0.534695        | -0.854105        | -0.31941         |
| C12orf65     | -0.4991375       | -1.07643         | -1.4112575       | -0.5772925       | -0.91212         | -0.3348275       |
| C1orf77      | -0.23045         | -0.513875        | -0.64416         | -0.283425        | -0.41371         | -0.130285        |
| C2CD3        | 1.479835         | 2.438585         | 3.0981475        | 0.95875          | 1.6183125        | 0.6595625        |
| C2orf42      | -0.4126275       | -0.91012         | -1.3778675       | -0.4974925       | -0.96524         | -0.4677475       |
| C2orf44      | -0.8576675       | -1.829985        | -2.10993         | -0.9723175       | -1.2522625       | -0.279945        |
| CDC42        | 0.7771675        | 1.172215         | 2.373625         | 0.3950475        | 1.5964575        | 1.20141          |
| CDC42EP2     | -0.53515         | -1.1288325       | -1.70732         | -0.5936825       | -1.17217         | -0.5784875       |
| CENPBD1      | -0.3886075       | -0.79783         | -1.2105575       | -0.4092225       | -0.82195         | -0.4127275       |
| CETN3        | -0.2689575       | -1.0101075       | -1.8200475       | -0.74115         | -1.55109         | -0.80994         |
| CHST11       | -0.91204         | -1.6217325       | -2.078715        | -0.7096925       | -1.166675        | -0.4569825       |
| CNST         | 0.5914525        | 0.6592975        | 1.5151525        | 0.067845         | 0.9237           | 0.855855         |
| COPB2        | -0.1261          | -0.4649          | -0.8641          | -0.3388          | -0.738           | -0.3992          |
| CRNKL1       | -0.852995        | -1.59703         | -2.5578675       | -0.744035        | -1.7048725       | -0.9608375       |
| CSTF1        | -0.4348125       | -1.0388175       | -1.278875        | -0.604005        | -0.8440625       | -0.2400575       |
| CSTF3        | -0.403565        | -1.0431125       | -1.1276725       | -0.6395475       | -0.7241075       | -0.08456         |
| DIDO1        | -0.538355        | -1.2459925       | -1.6652175       | -0.7076375       | -1.1268625       | -0.419225        |
| DYRK2        | -0.426845        | -0.8710575       | -1.113375        | -0.4442125       | -0.68653         | -0.2423175       |
| EPC2         | -0.5868825       | -1.0630075       | -1.341335        | -0.476125        | -0.7544525       | -0.2783275       |
| FADD         | -0.655425        | -1.267175        | -1.713425        | -0.61175         | -1.058           | -0.44625         |
| GEMIN6       | -0.50808         | -1.1457425       | -1.573205        | -0.6376625       | -1.065125        | -0.4274625       |
| GIMAP7       | -0.73385         | -1.521575        | -2.10845         | -0.787725        | -1.3746          | -0.586875        |
| GIN1         | -0.2513925       | -0.902375        | -1.6682025       | -0.6509825       | -1.41681         | -0.7658275       |
| GPBP1        | -0.301765        | -0.843915        | -1.3855325       | -0.54215         | -1.0837675       | -0.5416175       |
| GSPT2        | -0.2880275       | -0.7380625       | -0.9478875       | -0.450035        | -0.65986         | -0.209825        |
| GVINP1       | -0.181075        | -0.5496475       | -0.81325         | -0.3685725       | -0.632175        | -0.2636025       |
| HEATR1       | -0.2741175       | -0.68577         | -1.0631375       | -0.4116525       | -0.78902         | -0.3773675       |
| HMGCR        | -0.429175        | -1.0593          | -1.632605        | -0.630125        | -1.20343         | -0.573305        |
| HN1L         | -0.369005        | -0.94906         | -1.253055        | -0.580055        | -0.88405         | -0.303995        |
| HSPA4        | -0.435225        | -0.9812          | -1.5765          | -0.545975        | -1.141275        | -0.5953          |
| IL1B         | -1.235475        | -2.352575        | -2.8848825       | -1.1171          | -1.6494075       | -0.5323075       |
| IL6ST        | 1.4587925        | 2.0368975        | 2.7951625        | 0.578105         | 1.33637          | 0.758265         |
| LOC100287628 | 0.63096          | 0.774765         | 1.2696           | 0.143805         | 0.63864          | 0.494835         |
| MAK16        | -0.419415        | -0.83922         | -0.9059375       | -0.419805        | -0.4865225       | -0.0667175       |
| MAPK11P1L    | 0.56491          | 1.04575          | 1.7044325        | 0.48084          | 1.1395225        | 0.6586825        |
| MDM2         | -0.637805        | -1.30383         | -2.010325        | -0.666025        | -1.37252         | -0.706495        |
| MED17        | -0.6928925       | -1.3621525       | -1.690735        | -0.66926         | -0.9978425       | -0.3285825       |
| MED17        | 1.582375         | 1.4581525        | 1.60161          | -0.1242225       | 0.019235         | 0.1434575        |
| MED9         | 1.5337475        | 1.88217          | 3.033865         | 0.3484225        | 1.5001175        | 1.151695         |
| MFAP1        | -0.6449325       | -1.551075        | -1.7969675       | -0.9061425       | -1.152035        | -0.2458925       |
| MORC2        | -0.55573         | -1.0931675       | -1.3829125       | -0.5374375       | -0.8271825       | -0.289745        |
| MORC2        | -0.5461975       | -1.1184225       | -1.511925        | -0.572225        | -0.9657275       | -0.3935025       |
| MRFAP1L1     | -0.208825        | -0.7095          | -1.10486         | -0.500675        | -0.896035        | -0.39536         |
| MRPL46       | -0.152575        | -0.669765        | -1.0323175       | -0.51719         | -0.8797425       | -0.3625525       |
| MRPL50       | -0.3139675       | -0.829785        | -1.210265        | -0.5158175       | -0.8962975       | -0.38048         |
| MTERF        | -0.861935        | -1.7231025       | -2.01703         | -0.8611675       | -1.155095        | -0.2939275       |
| MTERF        | -0.7022625       | -1.6557375       | -2.0061675       | -0.953475        | -1.303905        | -0.35043         |
| NAT1         | -0.5813025       | -1.3278725       | -1.51271         | -0.74657         | -0.9314075       | -0.1848375       |
| NDUFAF1      | -0.174755        | -0.5146625       | -0.9225875       | -0.3399075       | -0.7478325       | -0.407925        |
| NFKBIA       | 0.553025         | 0.820725         | 1.738075         | 0.2677           | 1.18505          | 0.91735          |
| NXT1         | 0.32405          | 0.565275         | 1.339875         | 0.241225         | 1.015825         | 0.7746           |
| PPP1R2       | 0.2926875        | 0.4604875        | 0.9987625        | 0.1678           | 0.706075         | 0.538275         |
| PURA         | -0.55877         | -1.19882         | -1.8941525       | -0.64005         | -1.3353825       | -0.6953325       |
| RAB3GAP1     | 0.4910975        | 0.8983425        | 1.3716825        | 0.407245         | 0.880585         | 0.47334          |

| Gene     | log2 ratio 2h/0h | log2 ratio 4h/0h | log2 ratio 8h/0h | log2 ratio 2h/4h | log2 ratio 2h/8h | log2 ratio 4h/8h |
|----------|------------------|------------------|------------------|------------------|------------------|------------------|
| RBM4B    | -0.3360625       | -0.80208         | -1.15197         | -0.4660175       | -0.8159075       | -0.34989         |
| RC3H2    | 0.755005         | 1.39067          | 2.038595         | 0.635665         | 1.28359          | 0.647925         |
| RIMBP3   | -0.82027         | -1.7105          | -2.6543675       | -0.89023         | -1.8340975       | -0.9438675       |
| RNASEL   | -0.42542         | -1.139175        | -1.82976         | -0.713755        | -1.40434         | -0.690585        |
| RNF34    | -0.4826075       | -1.2446325       | -1.77408         | -0.762025        | -1.2914725       | -0.5294475       |
| SBDS     | 0.3818525        | 0.7431675        | 1.598585         | 0.361315         | 1.2167325        | 0.8554175        |
| SBDS     | 0.3727625        | 0.6952875        | 1.51689          | 0.322525         | 1.1441275        | 0.8216025        |
| SCYL3    | -0.124155        | -0.52577         | -0.9453225       | -0.401615        | -0.8211675       | -0.4195525       |
| SETX     | -0.30595         | -0.9119425       | -1.4618325       | -0.6059925       | -1.1558825       | -0.54989         |
| SFT2D3   | -0.3977875       | -1.0195975       | -1.276025        | -0.62181         | -0.8782375       | -0.2564275       |
| SH3BP5L  | -0.36945         | -0.886975        | -1.3453875       | -0.517525        | -0.9759375       | -0.4584125       |
| SLA      | -0.841175        | -1.379775        | -1.646125        | -0.5386          | -0.80495         | -0.26635         |
| SLED1    | 1.61472          | 3.111885         | 5.168275         | 1.497165         | 3.553555         | 2.05639          |
| SP3      | -0.4036          | -0.8888825       | -1.12814         | -0.4852825       | -0.72454         | -0.2392575       |
| STK17B   | 0.733075         | 1.225675         | 1.82845          | 0.4926           | 1.095375         | 0.602775         |
| STX3     | -0.432525        | -0.8736075       | -1.174465        | -0.4410825       | -0.74194         | -0.3008575       |
| SUV420H1 | -0.5821625       | -1.4390975       | -2.4080125       | -0.856935        | -1.82585         | -0.968915        |
| THAP1    | -0.423035        | -0.9119975       | -1.184165        | -0.4889625       | -0.76113         | -0.2721675       |
| TMEM177  | -0.56284         | -1.300495        | -1.8408          | -0.737655        | -1.27796         | -0.540305        |
| TNFAIP3  | 0.8747775        | 1.6623525        | 2.6232775        | 0.787575         | 1.7485           | 0.960925         |
| TPM3     | 1.0845125        | 1.7346925        | 2.9539075        | 0.65018          | 1.869395         | 1.219215         |
| TRIM13   | -1.0996025       | -1.94892         | -2.0727425       | -0.8493175       | -0.97314         | -0.1238225       |
| UMPS     | -0.62904         | -1.35998         | -2.330325        | -0.73094         | -1.701285        | -0.970345        |
| USP47    | -0.2246775       | -0.7096675       | -1.2646925       | -0.48499         | -1.040015        | -0.555025        |
| ZBTB24   | 1.8478725        | 2.2735175        | 3.08756          | 0.425645         | 1.2396875        | 0.8140425        |
| ZBTB3    | -0.9423375       | -1.79891         | -2.14016         | -0.8565725       | -1.1978225       | -0.34125         |
| ZC3H10   | -0.8670425       | -1.3464125       | -1.87629         | -0.47937         | -1.0092475       | -0.5298775       |
| ZFAND2A  | 0.53593          | 0.95292          | 1.608975         | 0.41699          | 1.073045         | 0.656055         |
| ZFP82    | 0.04751          | -0.918595        | -1.71429         | -0.966105        | -1.7618          | -0.795695        |
| ZFYVE26  | -0.32258         | -0.7870475       | -1.0931925       | -0.4644675       | -0.7706125       | -0.306145        |
| ZNF17    | -0.70671         | -1.578675        | -1.89334         | -0.871965        | -1.18663         | -0.314665        |
| ZNF180   | -0.7417725       | -1.5287275       | -1.7311875       | -0.786955        | -0.989415        | -0.20246         |
| ZNF184   | -0.521385        | -1.244805        | -1.4775375       | -0.72342         | -0.9561525       | -0.2327325       |
| ZNF217   | -0.773875        | -1.61059         | -2.077085        | -0.836715        | -1.30321         | -0.466495        |
| ZNF222   | -0.6665125       | -1.2623125       | -1.3680425       | -0.5958          | -0.70153         | -0.10573         |
| ZNF226   | -0.783305        | -1.41327         | -2.0338475       | -0.629965        | -1.2505425       | -0.6205775       |
| ZNF232   | -0.3850875       | -1.15            | -1.50941         | -0.7649125       | -1.1243225       | -0.35941         |
| ZNF234   | -0.7383775       | -1.284025        | -1.70007         | -0.5456475       | -0.9616925       | -0.416045        |
| ZNF26    | 0.2135525        | 0.3724875        | 0.7551725        | 0.158935         | 0.54162          | 0.382685         |
| ZNF350   | -0.7293675       | -1.3375775       | -1.62225         | -0.60821         | -0.8928825       | -0.2846725       |
| ZNF397   | -0.8792925       | -1.2945025       | -1.61011         | -0.41521         | -0.7308175       | -0.3156075       |
| ZNF416   | -0.9044025       | -1.6558475       | -1.551065        | -0.751445        | -0.6466625       | 0.1047825        |
| ZNF419   | -0.598835        | -1.1659425       | -1.37367         | -0.5671075       | -0.774835        | -0.2077275       |
| ZNF562   | -0.4471625       | -0.8968025       | -1.1743          | -0.44964         | -0.7271375       | -0.2774975       |
| ZNF611   | -0.2360925       | -0.8031675       | -1.222315        | -0.567075        | -0.9862225       | -0.4191475       |
| ZNF613   | -0.7906675       | -1.96065         | -2.62365         | -1.1699825       | -1.8329825       | -0.663           |
| ZNF616   | -0.06306         | -0.71805         | -0.9335525       | -0.65499         | -0.8704925       | -0.2155025       |
| ZNF766   | -0.39583         | -1.005375        | -0.908845        | -0.609545        | -0.513015        | 0.09653          |
| ZNF773   | -0.6153975       | -1.38546         | -1.2723425       | -0.7700625       | -0.656945        | 0.1131175        |
| ZNF830   | -0.761475        | -1.4393675       | -1.76902         | -0.6778925       | -1.007545        | -0.3296525       |
| ZNRD1    | -0.33485         | -0.7274          | -0.920675        | -0.39255         | -0.585825        | -0.193275        |
| ZSCAN16  | -0.2189525       | -0.5248625       | -0.73946         | -0.30591         | -0.5205075       | -0.2145975       |

p-value <5% (Bonferroni-corrected, i.e. <1.84E-6); log2 ratios refer to ratios of intensities at the bench-times indicated

**Table S2. Expression of blood reference and immunomodulatory marker genes**

|                                 | Fresh Phase I samples |                                        | EPIC biobank samples |                                        | NSHDS biobank samples |                                        |
|---------------------------------|-----------------------|----------------------------------------|----------------------|----------------------------------------|-----------------------|----------------------------------------|
|                                 | Expression average    | t-test p-value (vs overall expression) | Expression average   | t-test p-value (vs overall expression) | Expression average    | t-test p-value (vs overall expression) |
| <b>Blood reference gene</b>     |                       |                                        |                      |                                        |                       |                                        |
| B2M                             | 14.76                 | 1.51E-40                               | 13.84                | 2.96E-44                               | 14.18                 | 1.03E-78                               |
| GAPDH                           | 14.08                 | 5.59E-17                               | 12.88                | 2.01E-16                               | 12.95                 | 1.04E-26                               |
| PPP1CA                          | 11.10                 | 1.06E-07                               | 10.35                | 3.48E-09                               | 9.88                  | 1.64E-09                               |
| <b>Inflammation marker gene</b> |                       |                                        |                      |                                        |                       |                                        |
| CXCL1                           | 12.26                 | 2.88E-08                               | 10.89                | 4.25E-07                               | 11.42                 | 6.31E-14                               |
| HMOX1                           | 12.18                 | 5.66E-08                               | 10.22                | 7.41E-05                               | 11.24                 | 1.05E-12                               |
| ICAM1                           | 10.48                 | 0.00525                                | 9.75                 | 0.00145                                | 9.97                  | 8.39E-06                               |
| IL1B                            | 10.75                 | 0.00132                                | 8.92                 | 0.0675                                 | 11.19                 | 2.26E-12                               |
| IL1RN                           | 10.52                 | 0.00431                                | 6.37                 | 0.0199                                 | 8.55                  | 0.136                                  |
| IL6R                            | 11.86                 | 7.93E-07                               | 9.94                 | 0.000452                               | 10.92                 | 1.13E-10                               |
| MMP9                            | 13.30                 | 7.89E-13                               | 9.32                 | 0.000450                               | 12.34                 | 4.71E-21                               |
| PTGS2                           | 9.38                  | 0.125                                  | 7.48                 | 0.608                                  | 8.89                  | 0.00194                                |
| SERPINE1                        | 8.88                  | 0.755                                  | 8.36                 | 0.355                                  | 7.75                  | 0.840                                  |
| TGFB1                           | 11.33                 | 3.93E-05                               | 10.48                | 1.15E-05                               | 10.13                 | 1.62E-06                               |
| TNF                             | 8.47                  | 0.649                                  | 6.94                 | 0.0466                                 | 7.37                  | 0.158                                  |

Green = significantly higher expression of gene vs. overall

Red = significantly lower expression of gene vs. overall

Blood reference genes were selected in accordance with Karlovich et al. 2009. The overall average expression of all genes (log2-transformed intensities) were 8.68 for the fresh Phase I samples, 7.8 for the EPIC samples and 7.84 for the NSHDS samples

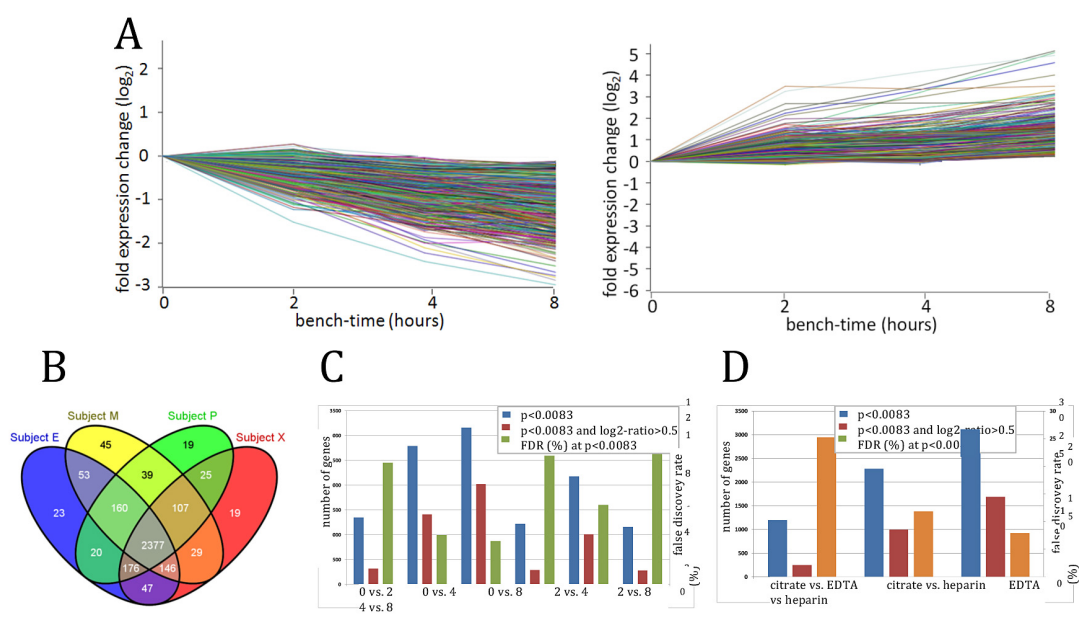

**Figure S1. Transcriptomics Phase 1.**

A, bench-time effects showing 2 significant temporal expression profiles identified by STEM analysis of a list of significant genes identified by ANOVA ( $p < 0.05$ ); B: Venn diagram showing the numbers of overlapping genes from A; 90% of the genes overlap between at least three of the four subjects; C: numbers of significant paired t-test genes at a Bonferroni-corrected  $p < 0.0083$  ( $0.05/6$ ) for each time point comparison, either with or without a  $\log_2$  ratio cut-off of 0.5 (left axis), and the associated FDR level (right axis); D: numbers of significant paired t-test genes at a Bonferroni-corrected p-value of 0.017 for each anticoagulant comparison, either with or without a  $\log_2$  ratio cut-off of 0.5 (left axis), and the associated FDR level (right axis).

## Video

Video of procedure for handling of buffy coats, frozen in the absence of RNA preservative, for the extraction of transcriptomics-quality RNA. Available as a separate mp4 file on the EHP website. Running time 2 min. 37 sec.

## Methods

### *Design of Phase I experiments*

Five experiments using blood freshly collected from volunteers were conducted in Phase I, as follows:

#### Experiment 1:

Purpose:

1. Check influence of all variables on RNA quality and quantity (Table 1)
2. Compare gene expression microarray quality with that of biobanked samples (Fig. 1E,F)
3. Evaluate the effects of all parameters on metabolomics (Fig. 3)
4. Evaluate the effects of all parameters on proteomics (Fig. 4)

Sample treatment:

#### a) Material from 3 subjects

- no RNA stabilizer
- anticoagulant: citrate, EDTA, heparin (2 subjects each)
- bench-time: 0, 2, 4, 8, 24hr (all times per subject)
- storage temperature: 80°C/liquid N<sub>2</sub> (both temperatures per subject)

#### b) Material from 1 subject

- no RNA stabilizer
- all 3 anticoagulants, bench-time 0hr, both storage temperatures

#### Experiment 2

Purpose:

1. Compare epigenomics microarray quality with that of biobanked samples (Fig. 2B)
2. Evaluate bench-time effects on transcriptomics and epigenomics, (Figs 1A,B, 2A)

Sample treatment:

Material from 4 subjects:

- anticoagulant: EDTA
- bench-time: 0, 2, 4, 8hr, then split samples into two and add RNAlater to one fraction
- storage temperature: 80°C

### Experiment 3

Purpose: Evaluate anticoagulant effects on transcriptomics (Fig. 1C)

Sample treatment (material from 4 subjects):

- anticoagulant: citrate, EDTA, heparin (all for each subject)
- bench-time: 2.5hr, then RNAlater added
- storage temperature: 80°C

### Experiment 4

Purpose: Evaluate storage temperature effects on transcriptomics (Fig. 1D)

Sample treatment (material from 4 subjects):

- no RNA stabilizer
- anticoagulant: EDTA
- storage temperature: 80°C/liquid N<sub>2</sub> (both temperatures per subject)

### Experiment 5

Purpose: Evaluate anticoagulant and storage temperature effects on epigenomics

Sample treatment (material from 3 subjects):

- no RNA stabilizer
- anticoagulant: citrate, EDTA, heparin (all subjects each)
- storage temperature: 80°C/liquid N<sub>2</sub> (both temperatures per subject)

### ***Transcriptomics***

Each RNA sample (0.5 µg) was reverse-transcribed into cDNA and labelled with cyanine 3 (Cy3) following the one-color labeling protocol supplied by the manufacturer (Agilent Technologies, Amstelveen, The Netherlands). Hybridisation was carried out on Agilent 4 x 44K human whole genome microarrays. Samples used to check the effect of storage temperature were hybridized in triplicate. After hybridisation and washing, slides were scanned on an Agilent Technologies

G2565CA DNA Microarray Scanner (phase I samples) or a GenePix 4000B Microarray Scanner (Molecular Devices, Sunnyvale, CA) (phase II samples). The photomultiplier tube (PMT) gain was determined automatically and laser power was set to 100% and the PMT gain saturation tolerance to 0.02%.

Probes were defined as "good" when: a) the spot contained at least 75% of the maximum possible number of pixels; b) the raw mean / median ratio was above 0.9; c) the difference between spot and background intensity was  $>2.6$  times the SD of the background intensity); d) the number of saturated pixels was below 50%. Good probes were identified based on the number of pixels, mean/median intensity ratio, saturation, or foreground/background intensity ratio. In addition, several technical aspects were evaluated based on images representing the individual microarrays, as well as on the number of high-quality probes.

### ***Epigenomics***

Genome-wide analysis of DNA methylation was conducted on the Illumina Infinium HumanMethylation450 BeadChips platform using the protocol recommended by the manufacturer. Briefly, DNA was bisulphite-treated using the Zymo EZ DNA Methylation Kit to selectively convert cytosine residues to uracil, subsequently subjected to isothermal whole-genome amplification followed by enzymatic fragmentation and finally hybridised on the Infinium HumanMethylation 450 BeadChip. After single nucleotide extension of the hybridized DNA using nucleotides labelled with biotin (ddCTP and ddGTP) and 2,4-dinitrophenol (ddATP and ddTTP) and staining with antibodies differentiating between the two labels, the BeadChip was scanned with the HiScan SQ scanner (Illumina).



Methylation levels at each CpG site were expressed as the  $\beta$  value, representing the fraction methylated. The threshold value for acceptance of a  $\beta$  value was probe signal detection at  $p < 0.05$ . Probes detected at  $p > 0.05$  in more than 20% of the samples (336 probes) were filtered out of all datasets. Individual sample data were accepted if they had  $>95\%$  of good ( $p < 0.05$ ) probes.

### ***Metabolomics***

Aliquots of thawed plasma were treated for protein precipitation using cold methanol and the supernatant dried (Eppendorf SpeedVac) and then stored ( $-80^{\circ}\text{C}$ ) until required for analysis (1 week). Prior to analysis, the sample was resuspended in water and transferred to the autosampler. Samples were pooled to provide a quality control (QC) sample, fractions of which were interspersed within the batch during data acquisition (at least every 11 samples). Prior to each run a number of QC samples were injected onto the column to equilibrate interactions between the column matrix and metabolites. In Phase II, pooled QC samples were generated using equal quantities of all biobank samples

Reversed-phased chromatographic separation of the plasma sample preparation was conducted using an Acquity UPLC system (Waters Corporation, Milford, MA, USA) on a  $\text{C}_{18}$  column (Waters) and a binary gradient elution comprising water and acetonitrile (Table S3). Mass spectrometric analysis of the chromatographic eluent was performed using a quadrupole time-of-flight (QtoF) spectrometer (Waters), with data collected in centroid mode in the  $m/z$  range 100-1000. Analysis was performed sequentially in both positive and negative mode ESI (Table S4). Spectral data was analysed using the XCMS software package (Smith et al., 2006), comprising peak picking, retention time alignment and feature intensity evaluation. The pooled QC samples, injected at intervals throughout the analytical run, were used to identify

features with a low coefficient of variation, and these were selected for subsequent data analysis.

Mass spectral profile data was converted to NetCDF format using the DataBridge software (Waters) before processing using the XCMS package (Smith et al., 2006) running in the R computing environment. The ‘centWave’ algorithm (Tautenhahn et al., 2008) was used to identify spectral features following *s/n* thresholding and feature prefiltering. Retention time correction was applied for feature alignment prior to feature intensity calculation across all spectra for retention time-*m/z* (rtmz) feature. For each feature, the relative standard deviation (RSD %) through the analytical run was calculated from the pooled QC sample data. The feature list could then be thresholded at an appropriate level to select those with high reproducibility for use in subsequent multivariate analysis.

Spectral feature intensity values relating to a selection of key plasma metabolites were also derived using an additional targeted method in QuanLynx (Waters) for efficient comparison of analytical reproducibility across the sample sets.

### ***Wide-target plasma proteomics***

List of proteins analysed in Phase II samples: interleukin (IL)2, IL6, IL8, IL10, and tumor necrosis factor alpha, IL1 $\beta$ , IL4, IL5, IL7, IL13, interferon alpha, interferon gamma, eotaxin, fractalkine, interferon gamma-induced protein 10, granulocyte-macrophage colony stimulating factor, epidermal growth factor, fibroblast growth factor 2, granulocyte colony-stimulating factor, melanoma growth stimulatory activity/growth-related oncogene, monocyte chemotactic protein-1, monocyte chemotactic protein-3, macrophage derived chemokine, macrophage inflammatory protein 1 alpha, macrophage inflammatory protein 1 beta, soluble CD40 ligand,

transforming growth factor alpha and vascular endothelial growth factor) using the milliplex HCYTOMAG-60SK and HSCYTMAG-60SK kits (Millipore, Billerica, MA).

**Table S3. Metabolomics - Solvent Gradient Conditions.**

| <b>Time (min)</b> | <b>Flow (mL min<sup>-1</sup>)</b> | <b>% Solvent A</b> | <b>% Solvent B</b> | <b>Slope / Curve</b> |
|-------------------|-----------------------------------|--------------------|--------------------|----------------------|
| Initial           | 0.4                               | 99.9               | 0.1                | Linear               |
| 1                 | 0.4                               | 99.9               | 0.1                | Linear               |
| 16                | 0.4                               | 0.1                | 99.9               | Linear               |
| 18                | 0.4                               | 0.1                | 99.9               | Linear               |
| 19                | 0.4                               | 99.9               | 0.1                | Linear               |
| 20                | 0.4                               | 99.9               | 0.1                | Linear               |

**Table S4. Metabolomics - Standard Mass Spectrometry Instrument Conditions**

| <b>Parameter</b>                                | <b>ESI +ve mode</b> | <b>ESI -ve mode</b> |
|-------------------------------------------------|---------------------|---------------------|
| Ionisation mode                                 | positive            | negative            |
| Data collection                                 | centroid            | centroid            |
| Capillary voltage (V)                           | 3200                | 2700                |
| Sample cone voltage (V)                         | 35                  | 35                  |
| Desolvation/cone gas                            | N <sub>2</sub>      | N <sub>2</sub>      |
| Desolvation gas flow rate (L hr <sup>-1</sup> ) | 900                 | 900                 |
| Desolvation gas temperature (oC)                | 350                 | 350                 |
| Cone gas flow rate (L hr <sup>-1</sup> )        | 25                  | 25                  |
| Source temperature (oC)                         | 120                 | 120                 |
| Scan time (s)                                   | 0.1                 | 0.1                 |
| Interscan delay (s)                             | 0.01                | 0.01                |
| Scan <i>m/z</i> range                           | 50-1000             | 50-1000             |
| Ion Optics Mode                                 | V                   | V                   |
| MCP detector (V)                                | 1850                | 1850                |

## References

- Smith CA, Want EJ, O'Maille G, Abagyan R, Siuzdak G. 2006. XCMS: processing mass spectrometry data for metabolite profiling using nonlinear peak alignment, matching, and identification. *Anal Chem* 78:779-87.
- Tautenhahn R, Bottcher C, Neumann S. 2008. Highly sensitive feature detection for high resolution LC/MS. *BMC Bioinformatics* 9:504.
